# Supplementary material
Source: MDPI journal article supplement (https://www.mdpi.com/2071-1050/7/5/5564)
Supplement: s2 [file s2]

## Sheet: Sheet1
Nember	First Author	Time	Title	Journal	Main topic
1	Adhikari, B.	2013	Understanding the Social and Ecological Outcomes of PES Projects: A Review and an Analysis	Conservation & Society	comparision study
2	Bao, Y.	2007	Disadvantages and future research directions in valuation of ecosystem services in China	International Journal of Sustainable Development and World Ecology	ES valuation
3	Bennett Michael	2008	China's sloping land conversion program: Institutional innovation or business as usual?	Ecological Economics	implementation
4	Bennett Michael	2011	Incomplete property rights, exposure to markets and the provision of environmental services in China	China Economic Review	institutional setting
5	Bennett Michael	2014	China's Conversion of Cropland to Forest Program for Household Delivery of Ecosystem Services: How Important is a Local Implementation Regime to Survival Rate Outcomes?	FORESTS	implementation
6	Bullock Allison	2011	Evaluating China's Slope Land Conversion Program as sustainable management in Tianquan and Wuqi Counties	Journal of Environmental Management	change in income
7	Caldwell, I. M	2007	An integrated assessment model of carbon sequestration benefits: A case study of Liping county, China	Journal of Environmental Management	carbon sequestration
8	Cao, Shixiong	2008	Why large-scale afforestation efforts in China have failed to solve the desertification problem	Environmental Science & Technology	vegetation cover
9	Cao, Shixiong	2009	Impact of China's Grain for Green Project on the landscape of vulnerable arid and semi-arid agricultural regions: A case study in northern Shaanxi Province	Journal of Applied Ecology	vegetation cover
10	Cao, Shixiong	2009	An Investigation of Chinese Attitudes toward the Environment: Case Study Using the Grain for Green Project	Ambio	public attitude
11	Cao, Shixiong	2009	Attitudes of farmers in China's northern Shaanxi Province towards the land-use changes required under the Grain for Green Project, and implications for the project's success	Land Use Policy	farmers' attitude
12	Cao, Shixiong	2007	Impact of three soil types on afforestation in China's Loess Plateau: Growth and survival of six tree species and their effects on soil properties	Landscape and Urban Planning	soil properties
13	Cao, Shixiong	2009	Development and testing of a sustainable environmental restoration policy on eradicating the poverty trap in China's Changting County	PNAS	poverty alleviation
14	Cao, Shixiong	2010	Remembering the ultimate goal of environmental protection: Including protection of impoverished citizens in China's environmental policy	Ambio	poverty alleviation
15	Cao, Shixiong	2011	Excessive reliance on afforestation in China's arid and semi-arid regions: Lessons in ecological restoration	Earth-Science Reviews	desertification
16	Chang, R.	2011	Soil Carbon Sequestration Potential for "Grain for Green" Project in Loess Plateau, China	Environmental Management	carbon sequestration
17	Chen, Xiangang	2009	Carbon sequestration potential of the stands under the Grain for Green Program in Yunnan Province, China	Forest Ecology and Management	carbon sequestration
18	Chen, Xiangang	2009	Factors affecting land reconversion plans following a payment for ecosystem service program	Biological Conservation	re-enrollment decision
19	Chen, Xiangang	2009	Linking social norms to efficient conservation investment in payments for ecosystem services	PNAS	re-enrollment decision
20	Chen, Xiangang	2010	Using Cost-Effective Targeting to Enhance the Efficiency of Conservation Investments in Payments for Ecosystem Services	Conservation Biology	Cost-effectiveness
21	Chen, Xiangang	2012	Agent-based modeling of the effects of social norms on enrollment in payments for ecosystem services.	Ecological Modelling	re-enrollment decision
22	Chen, L	2013	Towards Sustainable Integrated Watershed Ecosystem Management: A Case Study in Dingxi on the Loess Plateau, China	Environmental Management	LUCC
23	Dai, Zunguo	2010	Intensive agropastoralism: dryland degradation, the Grain-to-Green Program and islands of sustainability in the Mu Us Sandy Land of China	Agriculture Ecosystems & Environmen	agricultural productivity
24	Dang, Xiaohu	2012	Emergy measures of carrying capacity and sustainability of a target region for an ecological restoration programme: A case study in Loess Hilly Region, China	Journal of Environmental Management	emergy
25	Dang, Xiaohu	2013	An ecological footprint and emergy based assessment of an ecological restoration program in the Loess Hilly Region of China	Ecological Engineering	emergy
26	Decheng, Zhou	2014	Modeling the effects of the Sloping Land Conversion Program on terrestrial ecosystem carbon dynamics in the Loess Plateau: A case study with Ansai County, Shaanxi province, China	Ecological Modelling	Carbon sequestration
27	Delang, C.O	2013	Chinese forest policy reforms after 1998: the case of the Natural Forest Protection Program and the Slope Land Conversion Program	International Forestry Review	review
28	Deng, Lei	2014	Land-use conversion and changing soil carbon stocks in China's 'Grain-for-Green' Program: a synthesis	GLOBAL CHANGE BIOLOGY	carbon sequestration
29	Deng, Lei	2012	Effects of the grain-for-green program on soil erosion in China	International Journal of Sediment Research	soil erosion
30	Deng, Lei	2011	Food security and farmers' income: Impacts of the Grain for Green Programme on rural households in China	Journal of Food Agriculture & Environment	change in income
31	Deng, Lei	2012	Effects of the grain-for-green program on soil erosion in China	International Journal of Sediment Research	soil erosion
32	Emily T. Yeh	2009	Greening western China: A critical view	Geoforum	review
33	Feng Xiaoming	2013	How ecological restoration alters ecosystem services: an analysis of carbon sequestration in China's Loess Plateau	Scientific Reports	carbon sequestration
34	Feng Zhiming	2005	Grain-for-green policy and its impacts on grain supply in West China	Land Use Policy	food security
35	Frayer, Jens	2014	Analyzing the drivers of tree planting in Yunnan, China, with Bayesian networks	Land Use Policy	farmers' attitude
36	Fu, B.	2014	Value of ecosystem hydropower service and its impact on the payment for ecosystem services	Science of the Total Environment	ES valuation
37	Gauvin Crystal	2010	Cost-Effectiveness of Payments for Ecosystem Services with Dual Goals of Environment and Poverty Alleviation	Environmental Management	cost-effectiveness
38	Gong Cheng	2012	Cost-effective compensation payments: A model based on Buying Green Cover to sustain ecological restoration	Forest Policy and Economics	cost-effectiveness
39	Groom Ben	2010	Relaxing rural constraints: a 'win-win' policy for poverty and environment in China ?	Oxford Economic Papers-New Series	poverty alleviation
40	Groom Ben	2012	REDD+ and rural livelihoods	Biological Conservation	change in income
41	Grosjean Pauline	2009	How Sustainable are Sustainable Development Programs? The Case of the Sloping Land Conversion Program in China	World Development	re-enrollment decision
42	Hannes König	2013	Regional impact assessment of land use scenarios in developing countries using the FoPIA approach: Findings from five case studies	Journal of Environmental Management	comparision study
43	Hannes König	2012	Assessing the impact of the sloping land conversion programme on rural sustainability in guyuan, western china	Land Degradation and Development	LUCC
44	He Jun	2009	Participatory technology development for incorporating non-timber forest products into forest restoration in Yunnan, Southwest China	Forest Ecology and Management	institutional setting
45	He, Jun	2014	Governing forest restoration: Local case studies of sloping land conversion program in Southwest China	Forest Policy and Economics	institutional setting
46	He, Jun	2014	Local Dynamics Driving Forest Transition: Insights from Upland Villages in Southwest China	Forests	LUCC
47	He, Jun	2015	Notions of justice in payments for ecosystem services: Insights from China's Sloping Land Conversion Program in Yunnan Province	Land Use Policy	institutional setting
48	Hong S. He	2011	Overview of Contemporary Issues of Forest Research and Management in China	Environmental Management	carbon sequestration
49	Horst, Weyerhaeuser	2005	Local impacts and responses to regional forest conservation and rehabilitation programs in China's northwest Yunnan province	Agricultural Systems	implementation
50	Hu, Chen-Xia	2006	Farmer's attitudes towards the Grain-for-Green programme in the Loess hilly area, China: A case study in two small catchments	International Journal of Sustainable Development and World Ecology	farmers' attitude
51	Huang, M.	2009	Payments for watershed services in Asia: A review of current initiatives	Journal of Sustainable Forestry	review
52	Huanhuan, Guo	2014	Rural households' willingness to participate in the Grain for Green program again: A case study of Zhungeer, China	Forest Policy and Economics	farmers' attitude
53	Jia, X	2014	The tradeoff and synergy between ecosystem services in the Grain-for-Green areas in Northern Shaanxi, China	Ecological Indicators	LUCC
54	Kelly, Peter	2013	Do farmers or governments make better land conservation choices? Evidence from China's Sloping Land Conversion Program	Journal of Forest Economics	Cost-effectiveness
55	Kelly, Peter	2013	Land Retirement and Nonfarm Labor Market Participation: An Analysis of China's Sloping Land Conversion Program	World Development	off-farm employment
56	Komarek, Adam M.	2014	Household-level effects of China's Sloping Land Conversion Program under price and policy shifts	Land Use Policy	change in income
57	Laura Ediger	2006	Upland China in Transition The Impacts of Afforestation on Landscape Patterns and Livelihoods	Mountain Research and Development	LUCC
58	Li Changbin	2010	Quantifying the Effect of Ecological Restoration on Soil Erosion in China's Loess Plateau Region: An Application of the MMF Approach	Environmental Management	soil erosion
59	Li Jie	2011	Rural household income and inequality under the sloping land conversion program in Western China	PNAS	change in income
60	Li, F.	2011	Estimating eco-compensation requirements for forest ecosystem conservation A case study in Hainan province, southern China	Outlook on Agriculture	ES valuation
61	Li, Li	2010	Assessing total factor productivity and efficiency change for farms participating in Grain for Green program in China: A case study from Ansai, Loess Plateau	Journal of Food Agriculture & Environment	agricultural productivity
62	Li, Li	2010	Efficiency and its determinant factors for smallholder farms in the Grain for Green Program on the Loess Plateau, China	Journal of Food Agriculture & Environment	agricultural productivity
63	Li, Shuangshuang	2013	Response of vegetation restoration to climate change and human activities in Shaanxi-Gansu-Ningxia Region	Journal of Geographical Sciences	vegetation cover
64	Li, Yu	2013	Effects of conservation policies on forest cover change in giant panda habitat regions, China	Land Use Policy	vegetation cover
65	Li, Yu-rui	2013	Local responses to macro development policies and their effects on rural system in China's mountainous regions: the case of Shuanghe Village in Sichuan Province	Journal of Mountain Science	farmers' attitude
66	Lian, Gang	2007	Farmer's perception and response towards land policy and eco-environment based on participatory rural appraisal: A case study in the Loess hilly area, China	International Journal of Sustainable Development and World Ecology	farmers' attitude
67	Liang Yicheng	2012	Does household composition matter? The impact of the Grain for Green Program on rural livelihoods in China	Ecological Economics	off-farm employment
68	Liao Xianchun	2008	Economic impacts of shifting sloping farm lands to alternative uses	Agricultural Systems	LUCC
69	Lin Huang	2013	Effects of grassland restoration programs on ecosystems in arid and semiarid China	Journal of Environmental Management	vegetation cover
70	Liu, Can	2010	An Estimation of the Effects of China's Priority Forestry Programs on Farmers' Income	Environmental Management	change in income
71	Liu, Can	2013	The impact of China's Priority Forest Programs on rural households' income mobility	Land Use Policy	change in income
72	Liu, Jianguo	2008	Ecological and socioeconomic effects of China's policies for ecosystem services	PNAS	vegetation cover
73	Liu, Jianguo	2014	Did the key priority forestry programs affect income inequality in rural China?	Land Use Policy	change in income
74	Liu, JianXiang	2013	Responses of vegetation cover to the Grain for Green Program and their driving forces in the He-Long region of the middle reaches of the Yellow River	Journal of Arid Land	vegetation cover
75	Liu, X.	2011	Changes in species diversity and above-ground biomass of shrubland over long-term natural restoration process in the Taihang Mountain in North China	Plant Soil and Environment	biodiversity
76	Liu, X.	2011	Changes in species diversity and above-ground biomass of shrubland over long-term natural restoration process in the Taihang Mountain in North China	Plant Soil and Environment	biodiversity
77	Long, H. L	2006	Land use and soil erosion in the upper reaches of the Yangtze River: Some socio-economic considerations on China's Grain-for-Green Programme	Land Degradation & Development	soil erosion
78	Loucks, C. J.	2001	Ecology - Giant pandas in a changing landscape	Science	animal habitat
79	Lu, Y.	2012	A Policy-Driven Large Scale Ecological Restoration: Quantifying Ecosystem Services Changes in the Loess Plateau of China	PLoS ONE	soil erosion
80	Ma, Hua	2009	Rural Households' Attitude and Economic Strategies Toward the Conversion of Cropland to Forest and Grassland Program (CCFG): A Case Study in Qira, China	Environmental Management	farmers' attitude
81	Mao, Rong	2013	Effect of land-use change from cropland to poplar-based agroforestry on soil properties in a semiarid region of northeast China	Fresenius Environmental Bulletin	soil properties
82	McVicar, T. R.	2007	Developing a decision support tool for China's re-vegetation program: Simulating regional impacts of afforestation on average annual streamflow in the Loess Plateau	Forest Ecology and Management	hydrology
83	McVicar, T. R.	2010	Parsimoniously modelling perennial vegetation suitability and identifying priority areas to support China's re-vegetation program in the Loess Plateau: Matching model complexity to data availability	Forest Ecology and Management	hydrology
84	Miao, C. Y.	2012	The vegetation cover dynamics (1982-2006) in different erosion regions of the Yellow River Basin, China	Land Degradation & Development	LUCC
85	Mu, Lan	2014	Assessment of the soil organic carbon sink in a project for the conversion of farmland to forestland: a case study in zichang county, shaanxi, china	PLoS ONE	carbon sink
86	Mu, Shaojie	2013	Assessing the impact of restoration-induced land conversion and management alternatives on net primary productivity in Inner Mongolian grassland, China	Global and Planetary Change	LUCC
87	Ostwald, M.	2006	Land-use change: Impacts of climate variations and policies among small-scale farmers in the Loess Plateau, China	Land Use Policy	LUCC
88	Pan, Y.	2012	Ecological consequences of changing fuelwood consumption patterns in remote villages of northwestern China	Applied Ecology and Environmental Research	fuelwood consumption
89	Peng, H.	2007	Social, economic, and ecological impacts of the "Grain for Green" project in China: A preliminary case in Zhangye, Northwest China	Journal of Environmental Management	integrated study
90	Persson, Martin	2013	The Chinese Grain for Green Programme: Assessing the carbon sequestered via land reform	Journal of Environmental Management	carbon sequestration
91	Persson, Martin	2013	The Chinese Grain for Green Programme: Assessing the carbon sequestered vialand reform	Journal of Environmental Management	carbon sequestration
92	Qi, Yanbing	2012	Temporal-spatial variability of desertification in an agro-pastoral transitional zone of northern Shaanxi Province, China	Catena	desertification
93	Qin, Yuanwei	2013	Impacts of ecological restoration projects on agricultural productivity in China	Journal of Geographical Sciences	agricultural productivity
94	Qiu, Guo Yu	2011	Experimental studies on the effects of the "Conversion of Cropland to Grassland Program" on the water budget and evapotranspiration in a semi-arid steppe in Inner Mongolia, China	Journal of Hydrology	hydrology
95	Qiu, Guo Yu	2011	Effects of the "Conversion of Cropland to Forest and Grassland Program" on the Water Budget of the Jinghe River Catchment in China	Journal of Environmental Quality	hydrology
96	Qiu, Yaqin	2010	Valuation of Flood Reductions in the Yellow River Basin under Land Use Change	Journal of Water Resources Planning and Management-Asce	hydrology
97	Robert Costanza	2014	Ecosystem Services and Environmental Governance: Comparing China and the U.S	Asia & the Pacific Policy Studies	comparision study
98	Shen, Shicai	2010	Agrobiodiversity and Biocultural Heritage in the Dulong Valley, China	Mountain Research and Development	biodiversity
99	Shi, Min-Jun	2004	Land degradation, government subsidy, and smallholders' conservation decision: the case of the loess plateau in China	Journal of Zhejiang University. Science	soil erosion
100	Sjoegersten, S.	2013	Responses to climate change and farming policies by rural communities in northern China: A report on field observation and farmers’ perception in dryland north Shaanxi and Ningxia	Land Use Policy	climate change
101	Song Conghe	2014	sustainability of Forests Created by China's Sloping Land Conversion Program: A comparison among three sites in Anhui, Hubei and Shanxi	Forest Policy and Economics	change in income
102	Song, Xinzhang	2014	Chinese Grain for Green Program led to highly increased soil organic carbon levels: A meta-analysis	Scientific Reports	soil properties
103	Sun Zhanli	2013	A framework for modeling payments for ecosystem services with agent-based models, Bayesian belief networks and opinion dynamics models	Environmental Modelling & Software	farmers' attitude
104	Sun, Ge	2006	Potential water yield reduction due to forestation across China	Journal of Hydrology	hydrology
105	Sun, Wenyi	2013	Soil erosion and its response to the changes of precipitation and vegetation cover on the Loess Plateau	Journal of Geographical Sciences	soil erosion
106	Trac, Christine Jane	2007	Reforestation programs in southwest China: Reported success, observed failure, and the reasons why	Journal of Mountain Science	implementation
107	Trac, Christine Jane	2013	Environmental reviews and case studies: Is the returning farmland to forest program a success? three case studies from Sichuan	Environmental Practice	implementation
108	Tu Qin	2011	How do trust and property security influence household contributions to public goods?. The case of the sloping land conversion program in China	China Economic Review	institutional setting
109	Uchida Emi	2005	Grain for green: Cost-effectiveness and sustainability of China's conservation set-aside program.	Land Economics	cost-effectiveness
110	Uchida Emi	2007	Are the poor benefiting from China's land conservation program?	Environment and Development Economics	change in income
111	Uchida Emi	2009	Conservation payments, liquidity constraints, and off-farm labor: Impact of the grain-for-green program on rural households in China.	American Journal of Agricultural Economics	off-farm employment
112	Van Den Hoek, J.	2014	Evaluating forest policy implementation effectiveness with a cross-scale remote sensing analysis in a priority conservation area of Southwest China	Applied Geography	vegetation cover
113	Vijay K. Kolinjivadi	2012	A Review of Two Payment Schemes for Watershed Services from China and Vietnam: the Interface of Government Control and PES Theory	Ecology and Society	implementation
114	Vina, Andres	2013	Improving the efficiency of conservation policies with the use of surrogates derived from remotely sensed and ancillary data	Ecological Indicators	cost-effectiveness
115	Wang, Chunmei	2012	Evaluation of economic and social impacts of the sloping land conversion program: A case study in Dunhua County, China	Forest Policy and Economics	change in income
116	Wang, Chunmei	2007	Evaluation of the economic and environmental impact of converting cropland to forest: A case study in Dunhua county, China	Journal of Environmental Management	cost-effectiveness
117	Wang, Jieyong	2013	Spatio-Temporal Patterns of Cropland Conversion in Response to the "Grain for Green Project" in China's Loess Hilly Region of Yanchuan County	Remote Sensing	LUCC
118	Wang, Xinglian	2013	Use of exotic species during ecological restoration can produce effects that resemble vegetation invasions and other unintended consequences	Ecological Engineering	vegetation cover
119	Wang, Xiuhong	2013	Spatio-temporal changes in agrochemical inputs and the risk assessment before and after the grain-for-green policy in China	Environmental Monitoring and Assessment	agrochemical inputs
120	Wang, Xiuhong	2007	Implications for development of grain-for-green policy based on cropland suitability evaluation in desertification-affected north China	Land Use Policy	Cost-effectiveness
121	Wang, Xiuhong	2014	Emergy evaluation of agricultural sustainability of Northwest China before and after the grain-for-green policy	Energy Policy	emergy
122	Wang, Xuehong	2007	Estimating non-market environmental benefits of the Conversion of Cropland to Forest and Grassland Program: A choice modeling approach	Ecological Economics	ES valuation
123	Wang, Yafeng	2011	Effects of vegetation restoration on soil organic carbon sequestration at multiple scales in semi-arid Loess Plateau, China	Catena	carbon sequestration
124	Wang, Z.	2012	Temporal and spatial variations in soil organic carbon sequestration following revegetation in the hilly Loess Plateau, China	Catena	carbon sequestration
125	Wang, Z.	2010	Compensation for the conversion of sloping farmland to forest in china: A feasibility study of payment based on carbon sink	Journal of Environment and Development	carbon sink
126	Wei, Xiaohua	2013	Restoring ecosystem carbon sequestration through afforestation: A sub-tropic restoration case study	Forest Ecology and Management	carbon sequestration
127	Xi, Weimin	2014	Challenges to Sustainable Development in China: A Review of Six Large-Scale Forest Restoration and Land Conservation Programs	Journal of Sustainable Forestry	review
128	Xie, C.	2006	Livelihood impacts of the conversion of cropland to forest and grassland program	Journal of Environmental Planning and Management	change in income
129	Xu, Zhigang	2004	China's Sloping Land Conversion Programme four years on: current situation and pending issues	International Forestry Review	implementation
130	Xu, Zhigang	2006	Grain for green versus grain: Conflict between food security and conservation set-aside in China.	World Development	food security
131	Xu, jianying	2007	sustainability evaluation of the grain for green project: From local people's responses to ecological effectiveness in wolong nature reserve	Environmental Management	change in income
132	Xu, Jintao	2010	China's Sloping Land Conversion Program: Does Expansion Equal Success?	Land Economics	implementation
133	Xu, Jintao	2006	China's ecological rehabilitation: Unprecedented efforts, dramatic impacts, and requisite policies	Ecological Economics	integrated study
134	Xu, Q. X.	2013	Responses of Runoff and Soil Erosion to Vegetation Removal and Tillage on Steep Lands	Pedosphere	soil erosion
135	Xu, Wei	2014	Effects of "Grain for Green" reforestation program on rural sustainability in China: an AHP approach to peasant consensus of public land use policies	Stochastic Environmental Research and Risk Assessment	integrated study
136	Xu, Weihua	2006	Designing a conservation plan for protecting the habitat for giant pandas in the Qionglai mountain range, China	Diversity and Distributions	animal habitat
137	Xu, Y.	2011	Land use change and soil erosion in the Maotiao River watershed of Guizhou Province	Journal of Geographical Sciences	soil erosion
138	Yang, Hongfei	2014	Effects of ecological restoration projects on land use and land cover change and its influences on territorial NPP in Xinjiang, China	Catena	LUCC
139	Yang, Xiaojun	2014	Program sustainability and the determinants of farmers' self-predicted post-program land use decisions: evidence from the Sloping Land Conversion Program (SLCP) in China	Environment and Development Economics	re-enrollment decision
140	Yao, Shunbo	2011	An empirical analysis of the effects of china's land conversion program on farmers' income growth and labor transfer	Environmental Management	change in income
141	Yao, Shunbo	2010	Agricultural Productivity Changes Induced by the Sloping Land Conversion Program: An Analysis of Wuqi County in the Loess Plateau Region	Environmental Management	agricultural productivity
142	Yi, Xiaobo	2013	Land Suitability Assessment on a Watershed of Loess Plateau Using the Analytic Hierarchy Process	PLoS ONE	integrated study
143	Yin, Runsheng	2010	Assessing China's Ecological Restoration Programs: What's Been Done and What Remains to Be Done?	Environmental Management	implementation
144	Yin, Runsheng	2013	Designing and implementing payments for ecosystem services programs: Lessons learned from China's cropland restoration experience	Forest Policy and Economics	implementation
145	Yin, Runsheng	2012	Ecological restoration programs and payments for ecosystem services as integrated biophysical and socioeconomic processes-China's experience as an example	Ecological Economics	integrated study
146	Yin, Runsheng	2010	China's Primary Programs of Terrestrial Ecosystem Restoration: Initiation, Implementation, and Challenges	Environmental Management	implementation
147	Yin, Runsheng	2014	Designing and Implementing Payments for Ecosystem Services Programs: What Lessons Can Be Learned from China's Experience of Restoring Degraded Cropland?	Environmental Science & Technology	implementation
148	Yin, Runsheng	2014	The implementation and impacts of China’s largest payment forecosystem services program as revealed by longitudinal householddata	Land Use Policy	change in income
149	Ying Lin	2014	Impact of the Sloping Land Conversion Program on rural householdincome: An integrated estimation	Land Use Policy	change in income
150	Yuan, Wenping	2014	Characterization of locations and extents of afforestation from the Grain for Green Project in China	Remote Sensing Letters	LUCC
151	Zhai, De-Li	2014	Increasing tree cover while losing diverse natural forests in tropical Hainan, China	Regional Environmental Change	biodiversity
152	Zhang, K	2010	Change in soil organic carbon following the 'grain-for-green' programme in China	Land Degradation & Development	soil properties
153	Zhang, Kerong	2013	Sustainability of social-ecological systems under conservation projects: Lessons from a biodiversity hotspot in western China	Biological Conservation	LUCC
154	Zhang, Lei	2008	Payment for environmental services: The Sloping Land Conversion Program in Ningxia Autonomous Region of China	China and World Economy	change in income
155	Zhang, Yuandong	2008	Potential impact of afforestation on water yield in the subalpine region of southwestern China	Journal of the American Water Resources Association	hydrology
156	Zhang, Zhi-Hua	2013	Changes in some soil properties induced by re-conversion of cropland into grassland in the semiarid steppe zone of Inner Mongolia, China	Plant and Soil	soil properties
157	Zhao, Fazhu	2013	Policy-Guided Nationwide Ecological Recovery: Soil Carbon Sequestration Changes Associated With the Grain-to-Green Program in China	Soil Science	carbon sequestration
158	Zhao, Fazhu	2014	Soil structure and carbon distribution in subsoil affected by vegetation restoration	Plant Soil and Environment	soil properties
159	Zhen, Lin	2014	Herders' willingness to accept versus the public sector's willingness to pay for grassland restoration in the Xilingol League of Inner Mongolia, China	Environmental Research Letters	ES valuation
160	Zhen, Lin	2011	Payment for ecosystem services in China: An overview	Living Reviews in Landscape Research	review
161	Zhen, Nahui	2014	Changes of livelihood due to land use shifts: A case study of Yanchang County in the Loess Plateau of China	Land Use Policy	LUCC
162	Zhou, Decheng	2012	The Grain for Green Project induced land cover change in the Loess Plateau: A case study with Ansai County, Shanxi Province, China	Ecological Indicators	LUCC
163	Zhou, Hongjian	2009	Detecting the impact of the "Grain for Green" program on the mean annual vegetation cover in the Shaanxi province, China using SPOT-VGT NDVI data	Land Use Policy	vegetation cover
164	Zhou, Ping	2014	Changes in land use and agricultural production structure before and after the implementation of grain for green program in Western China - taking two typical counties as examples	Journal of Mountain Science	LUCC
165	Zhou, suoquan	2007	The costs and benefits of reforestation in Liping County, Guizhou Province, China	Journal of Environmental Management	change in income
166	Zhou, Z. C	2009	China's Grain for Green Program has reduced soil erosion in the upper reaches of the Yangtze River and the middle reaches of the Yellow River	International Journal of Sustainable Development and World Ecology	soil erosion
167	Zhou, Z. C	2009	China's Grain for Green Program has reduced soil erosion in the upper reaches of the Yangtze River and the middle reaches of the Yellow River	International Journal of Sustainable Development and World Ecology	soil erosion
